# Supplementary material for: Molecular dynamics study of Cr doping on the crystal structure and surficial/interfacial properties of 2H-MoS2
Source: Royal Society of Chemistry journal article supplement (doi:10.1039/d1cp05199g), 2022-01-01
Supplement: d1cp05199g1.pdf [file d1cp05199g1.pdf]

# **Molecular dynamics study of Cr doping on the crystal structure and surficial/interfacial properties of 2H-MoS<sub>2</sub>**

Jiqi Xing,<sup>a</sup> Hongyu Shi,<sup>a</sup> Yingdi Li<sup>a</sup> and Juan Liu<sup>\*a</sup>

## **Support information**

### **Table of Contents**

S1. Supplementary Figures

S2. Supplementary Tables

S3. Simulation Details

S4. Experimental Details

Supplementary References

## S1. Models with different doped lattice sites under the same doping amount

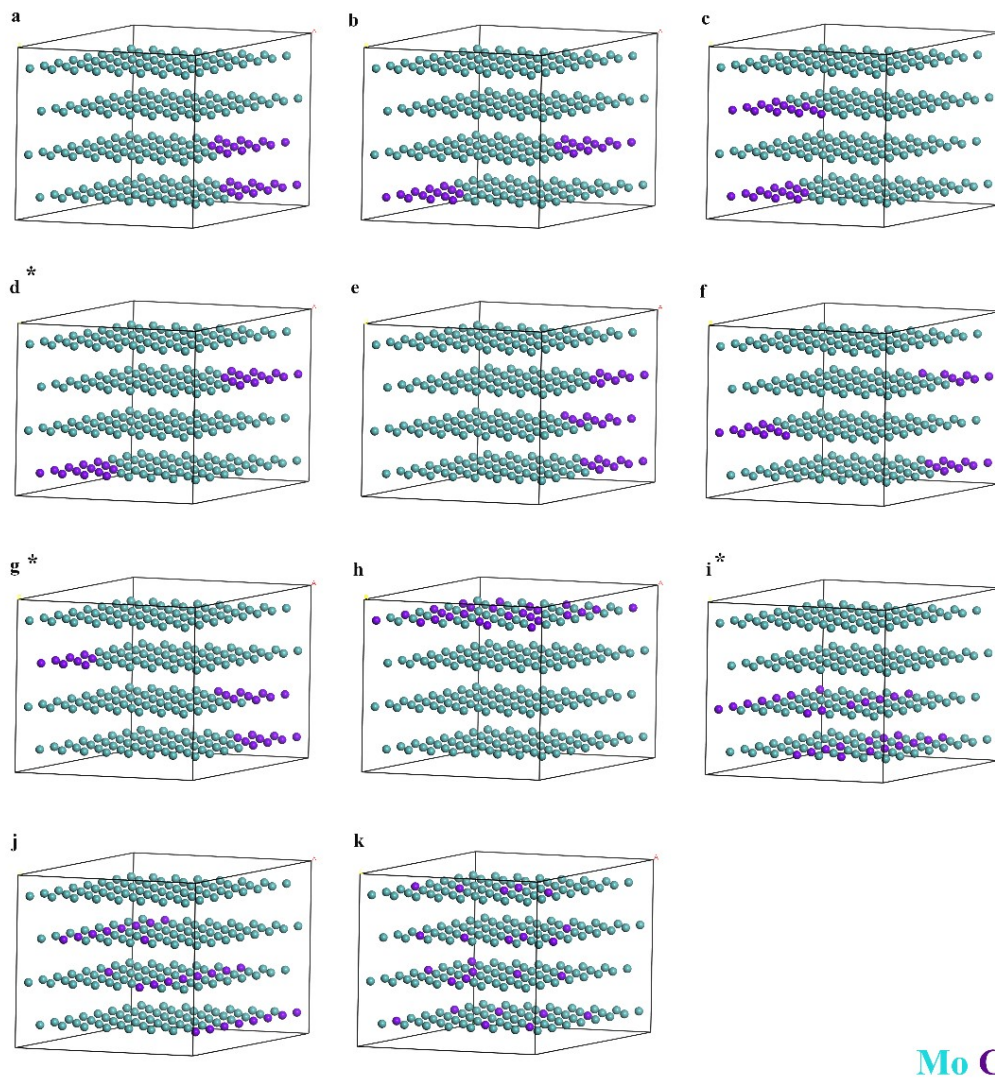

**Fig. S1** Model of different doping sites with Cr doping content is 10 at%. (a) - (k) are models (steady state model marked\*) of different doping sites. Sulfur atoms are omitted for a clear representation.

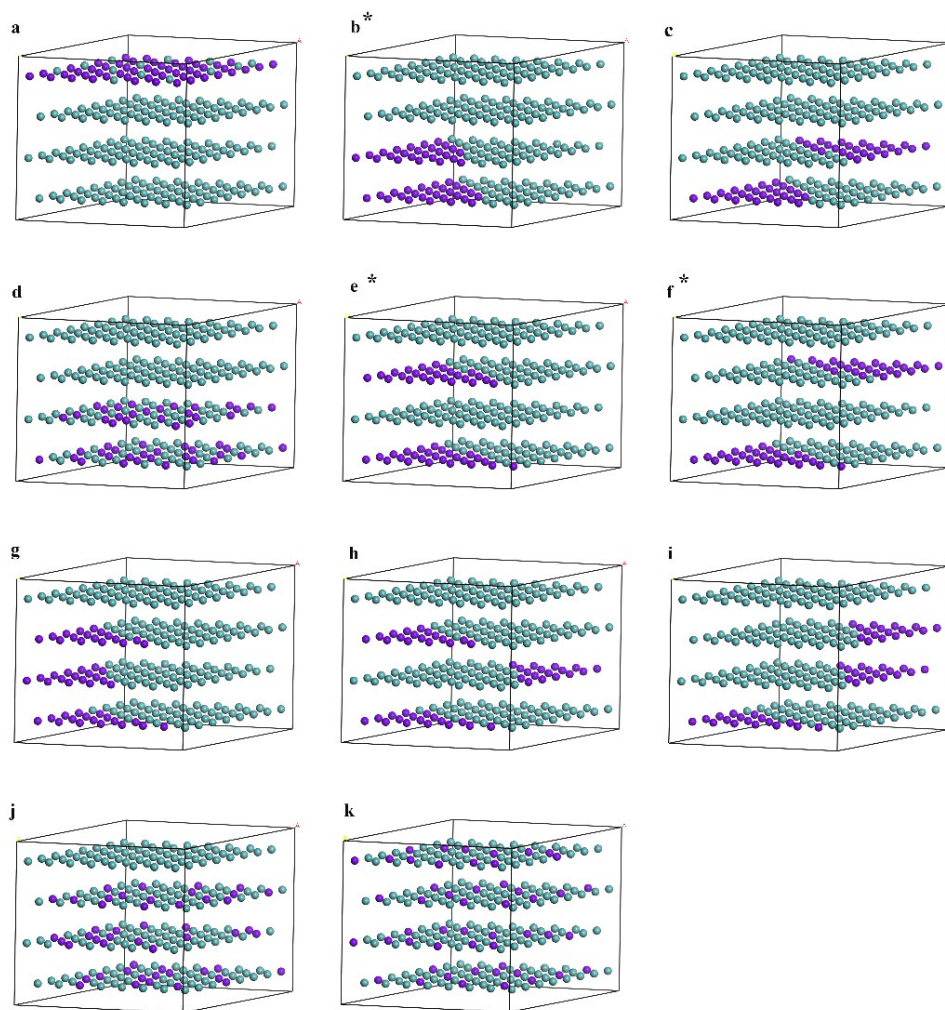

Mo Cr

**Fig. S2** Model of different doping sites with Cr doping content is 20at%. (a) - (k) are models (steady state model marked \*) of different doping sites. Sulfur atoms are omitted for a clear representation.

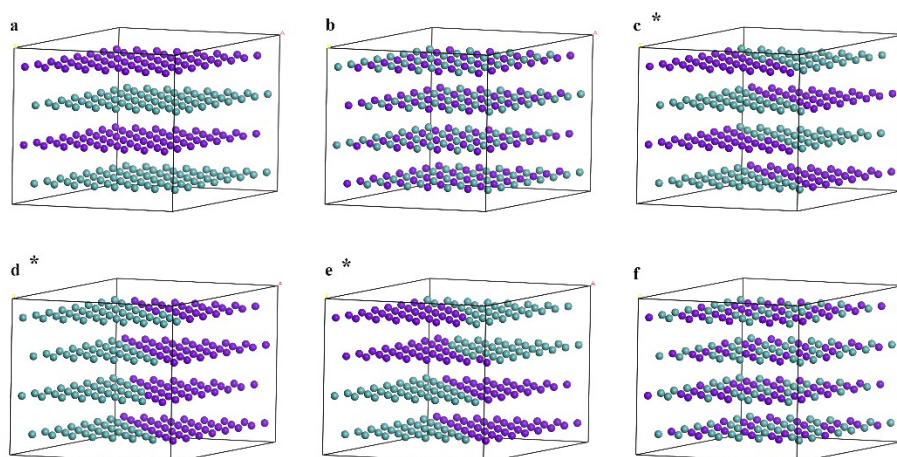

Mo Cr

**Fig. S3** Model of different doping sites with doping content is 50%. (a) - (f) are models (steady state model marked \*) of different doping sites. Sulfur atoms are omitted for a clear representation.

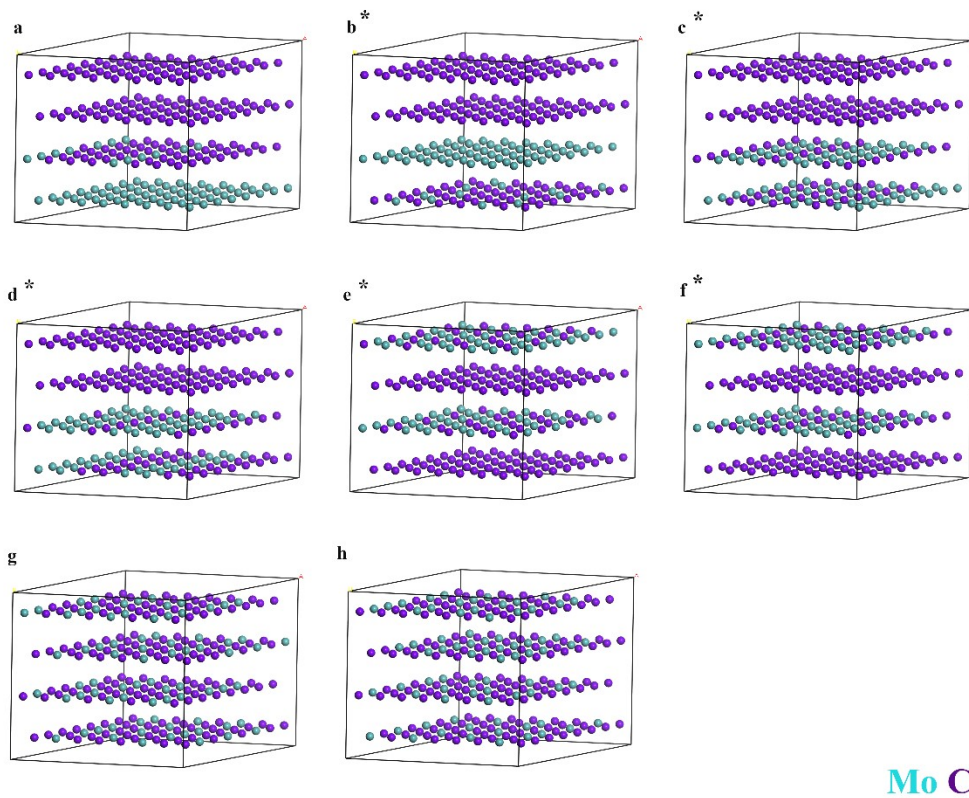

**Fig. S4** Model of different doping sites with Cr doping content is 50at%. (a) - (h) are models (steady state model marked \*) of different doping sites. Sulfur atoms are omitted for a clear representation.

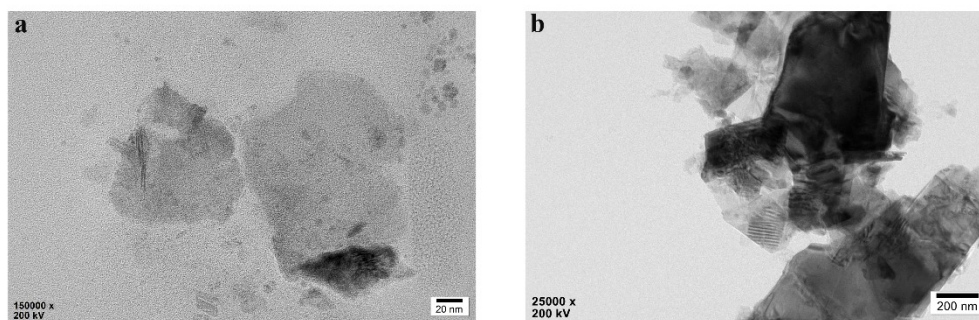

**Fig. S5** HRTEM images of bulk MoS<sub>2</sub> soaked in (a) CH<sub>3</sub>OH, and (b) water after 420 min ultra-sonication. Two independent TEM tests were performed per sample. On each copper mesh, 20 grids were counted.

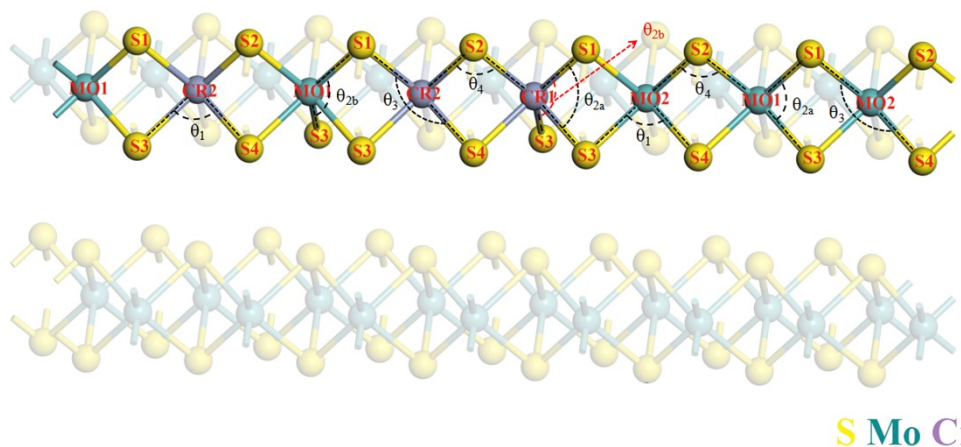

**Fig. S6** Schematic diagram of different angles in Cr doped MoS<sub>2</sub>. In order to clearly describe the bond angles in the model, we use five bond angles  $\theta_1$ ,  $\theta_2$ ,  $\theta_3$ ,  $\theta_4$  and  $\theta_5$ . Mo atoms are substituted by Cr atoms, the angles remain same as pure 2H-MoS<sub>2</sub><sup>2</sup>. The  $\theta_2$  angle ( $\angle S1-MO1(CR1)-S3$ ) can assume two values  $\theta_{2a}=78.38^\circ$  and  $\theta_{2b}=134.4^\circ$  in the model. We set the angle bending parameter of  $\theta_2$  to zero to ensure the calculation accuracy.

## S2. Supplementary Tables

**Table S1** The force field parameters of solvent molecules CH<sub>2</sub>I<sub>2</sub><sup>2</sup> and CH<sub>3</sub>OH

| I Nonbond                      |       | Atomic charge (e)    | $\sigma$ (pm)                                            | $\epsilon$ (kcal/mol) |
|--------------------------------|-------|----------------------|----------------------------------------------------------|-----------------------|
| CH <sub>2</sub> I <sub>2</sub> | C     | -0.086               | 400                                                      | 0.032                 |
|                                | H     | +0.090               | 268                                                      | 0.045                 |
|                                | I     | -0.047               | 438                                                      | 0.750                 |
| CH <sub>3</sub> OH             | C     | -0.040               | 410                                                      | 0.078                 |
|                                | H     | +0.090               | 268                                                      | 0.024                 |
|                                | O     | -0.650               | 353                                                      | 0.192                 |
|                                | H(OH) | +0.420               | 44.9                                                     | 0.046                 |
| II Bond                        |       | $r_{0,ij}$ (pm)      | $k_r$ (kcal mol <sup>-1</sup> · Å <sup>-2</sup> )        |                       |
| CH <sub>2</sub> I <sub>2</sub> | C-H   | 111                  | 309                                                      |                       |
|                                | C-I   | 215                  | 90                                                       |                       |
|                                | C-O   | 142                  | 428                                                      |                       |
| CH <sub>3</sub> OH             | C-H   | 111                  | 322                                                      |                       |
|                                | O-H   | 96                   | 545                                                      |                       |
| III Angles                     |       | $\theta_{0,ijk}$ (°) | $K_\theta$ (kcal mol <sup>-1</sup> · rad <sup>-2</sup> ) |                       |
| CH <sub>2</sub> I <sub>2</sub> | I-C-I | 112.96               | 95                                                       |                       |
|                                | I-C-H | 108.37               | 28                                                       |                       |
|                                | H-C-H | 110.40               | 35                                                       |                       |
| CH <sub>3</sub> OH             | H-C-O | 108.89               | 45.9                                                     |                       |
|                                | C-O-H | 106.00               | 57.5                                                     |                       |
|                                | H-C-H | 108.40               | 35.5                                                     |                       |

### **S3. Simulation details**

#### **S3.1 Supplementary construction details about System II: x at%Cr-MoS<sub>2</sub> (x = 0, 10, 20, 50, 70, 100) – water system**

The details of the establishment of the water box are described. First, a water cube ( $31.122 \times 31.122 \times 30.885 \text{ \AA}^3$ ) containing 1,000 water molecules is constructed according to the density ( $1 \text{ g/cm}^3$ ) under 101.3 MPa at 298 K. Then it undergoes a relaxation process of 1 ns. The equilibrium water cube were placed on the MoS<sub>2</sub> surface ( $126.416 \times 27.370 \times 24.295 \text{ \AA}^3$ ). The lattice parameter in c of x at% Cr - MoS<sub>2</sub> – water system is 100.295 Å. 131 water molecules out of the lattice were removed. The establishment of this system model and the above-mentioned relaxation process are all carried out in the Materials Studio.

### S3.2 Parameterization procedure

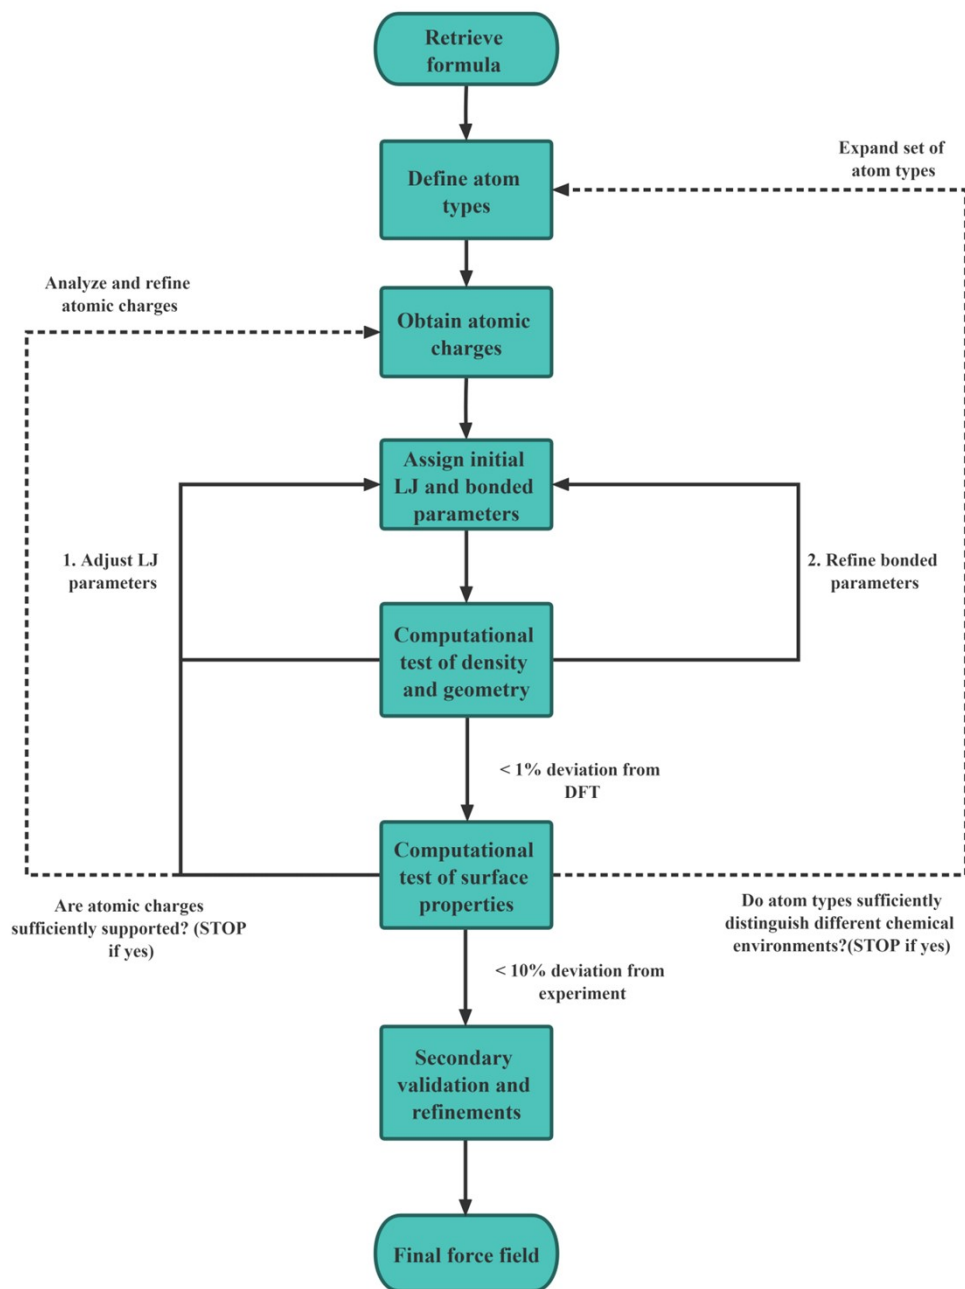

**Scheme S1.** Procedure for parameterization of CHARMM and CVFF force field <sup>3</sup>

To parameterize the Cr atom in 2H-MoS<sub>2</sub>, a lot of adjustments on  $\sigma$ ,  $\epsilon$ , bond constant, bond length, angle constant and angles were performed around initial setup values according to some key experimental reference data. The bond related items kept the same as the pure 2H-MoS<sub>2</sub> <sup>2</sup>. The force field parameters of 2H-MoS<sub>2</sub> we developed previously can well reproduce experimental properties such as the X-ray structure, surface energy, contact angles, bending stability, and modulus with high accuracy. Although Cr and Mo belong to the same group in the periodic table, the electron arrangement have to be distinguished by the  $\sigma$  and  $\epsilon$  in the LJ potential. Minor changes in the  $\sigma$  and

$\epsilon$  of Cr can be made to fit the DFT simulations. Every small change of parameter will go through a complete cycle of simulation calculation until the deviation is less than 1% comparing with the benchmark.

## **S4. Experimental details**

### **S4.1 Experimental equipment and reagents**

The KS-5200DE liquid crystal ultrasonic cleaning machine produced in Kunshan Jielimei Ultrasonic Instrument Co., Ltd. is used in this experiment, with a rated power of 200 W and a frequency of 40 KHz. H1650-W universal centrifuge produced by Changsha High-tech Industrial Development Zone Xiangyi Centrifuge Instrument Co., Ltd. Bulk MoS<sub>2</sub> is purchased in the form of powder from Shanghai Macklin Biochemical Co., Ltd, with a purity of 99%. The methanol solution is purchased from Shanghai Aladdin Biochemical Technology Co., Ltd., with a purity greater than or equal to 99.9%. High resolution transmission electron microscope (HRTEM, JEOL JEM-210003040701, Tokyo, Japan) is used to characterize the exfoliated MoS<sub>2</sub>.

### **S4.2 Experimental process**

Two 75 mg portions of MoS<sub>2</sub> were weighed and soaked in 10 mL methanol solvent and 10 mL deionized water respectively. Ultrasonic vibration at a frequency of 40 kHz, radiating power 180 W was performed at 24 °C. The MoS<sub>2</sub>-methanol and MoS<sub>2</sub>-water solutions were taken 0.5 h sonication, respectively, and followed by 1 h of standing to observe the state of the suspension. After 7 h of ultrasonic treatment and 14 h of immersion, the mixed solution was centrifuged at 5000 rpm for 10 minutes. Drop the solution 5 mm below the liquid surface on the copper mesh for the subsequent HRTEM observation.

## **Supplementary References**

1. G. Cunningham, M. Lotya, C. S. Cucinotta and Stefano Sanvito, ACS Nano, 2012, 6, 3468-3480.
2. J. Liu, J. Zeng, C. Zhu, J. Miao, Y. Huang and H. Heinz, Chem Sci, 2020, 11, 8708-8722.
3. H. Heinz, T.-J. Lin, R. Kishore Mishra and F. S. Emami, Langmuir, 2013, 29, 1754-1765.
